# Supplementary material
Source: Springer Nature journal article supplement (https://www.springermedizin.de/resource/supplementary/13058_2013_3420_MOESM7_ESM.pdf/9704130)
Supplement: MOESM7 [file 9704130]

**Additional file 7: Genes involved in cell cycle progression and DNA replication are downregulated in co-cultured PHBECs.** Gene set enrichment analysis (GSEA) was performed with genes that are upregulated in monocultured PHBECs and downregulated in co-cultured PHBECs. Most significant Molecular Signatures Database (MSigDB) gene sets (GS) enriched in mono-cultured PHBECs are shown. ES, enrichment score; NES, normalized enrichment score; NOM p-val, Nominal p value, statistical significance of the enrichment score; FDR, false discovery rate (<0.25 is significant).

| <b>GS MSigDB</b>                         | <b>ES</b> | <b>NES</b> | <b>NOM p-val</b> | <b>FDR q-val</b> |
|------------------------------------------|-----------|------------|------------------|------------------|
| <a href="#">KEGG_CELL_CYCLE</a>          | 0.58      | 2.35       | 0.000            | 0.000            |
| <a href="#">KEGG_DNA_REPLICATION</a>     | 0.71      | 2.34       | 0.000            | 0.000            |
| <a href="#">KEGG_MISMATCH_REPAIR</a>     | 0.72      | 2.12       | 0.000            | 0.000            |
| <a href="#">KEGG_PURINE_METABOLISM</a>   | 0.47      | 2.03       | 0.000            | 0.002            |
| <a href="#">KEGG_NITROGEN_METABOLISM</a> | 0.68      | 2.02       | 0.000            | 0.002            |
| <a href="#">KEGG_SPLICEOSOME</a>         | 0.49      | 2.00       | 0.000            | 0.003            |
| <a href="#">KEGG_RNA_DEGRADATION</a>     | 0.55      | 1.98       | 0.000            | 0.003            |

|                                                      |      |      |       |       |
|------------------------------------------------------|------|------|-------|-------|
| <a href="#"><u>KEGG_PYRIMIDINE_METABOLISM</u></a>    | 0.49 | 1.97 | 0.000 | 0.003 |
| <a href="#"><u>KEGG_HOMOLOGOUS_RECOMBINATION</u></a> | 0.64 | 1.95 | 0.000 | 0.003 |
| <a href="#"><u>KEGG_CITRATE_CYCLE_TCA_CYCLE</u></a>  | 0.60 | 1.90 | 0.002 | 0.006 |
